# Supplementary material for: Comparative promoter region analysis powered by CORG
Source: PubMed Central journal article supplement (PMC555765; doi:10.1186/1471-2164-6-24), 2005-02-21

# EPD promoter mapping (1700 instances)

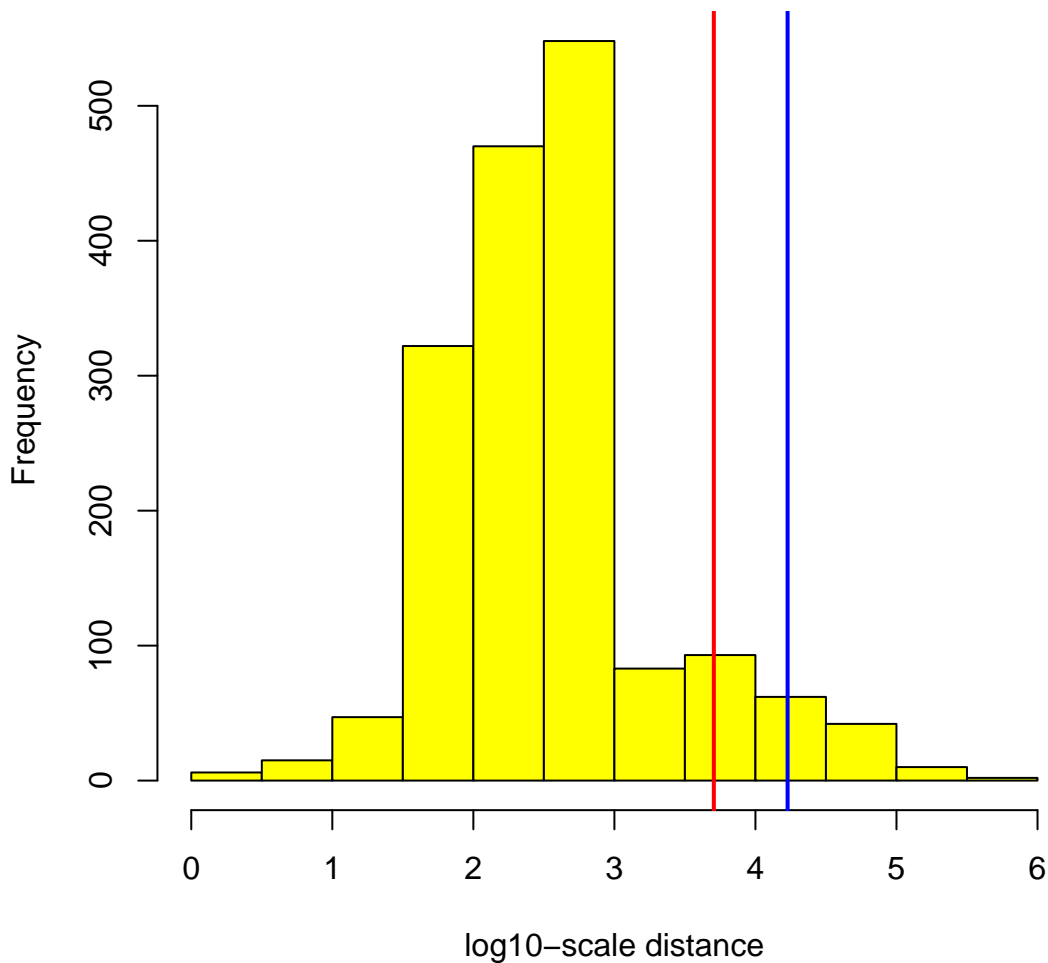

Supplement: 1471-2164-6-24-S1.pdf [file 1471-2164-6-24-S1.pdf]
